# Supplementary material
Source: PubMed Central journal article supplement (PMC2519804)

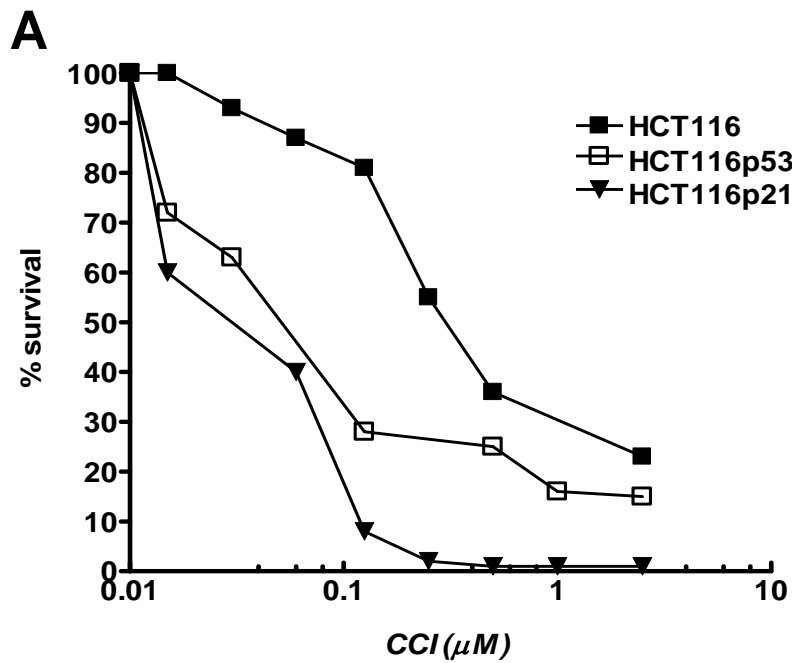

|                                            |        |
|--------------------------------------------|--------|
| IC <sub>50</sub> HCT116                    | 291 nM |
| IC <sub>50</sub> HCT116 p53 <sup>-/-</sup> | 51 nM  |
| IC <sub>50</sub> HCT116 p21 <sup>-/-</sup> | 22 nM  |

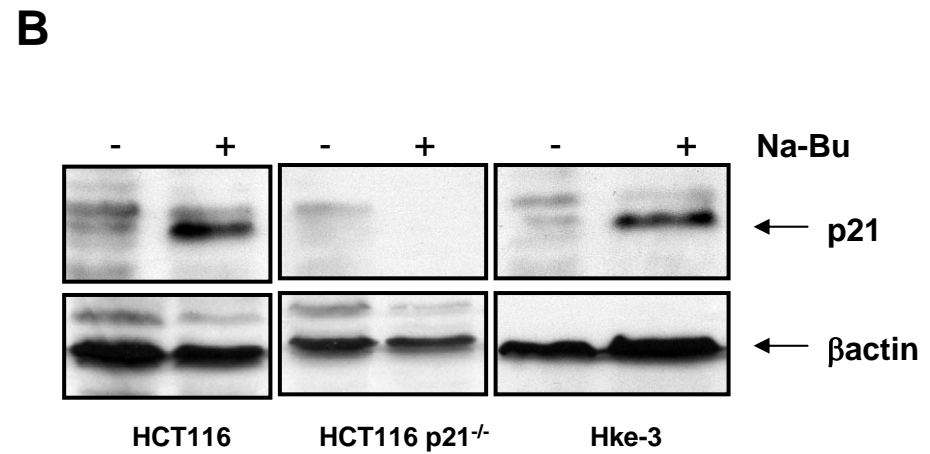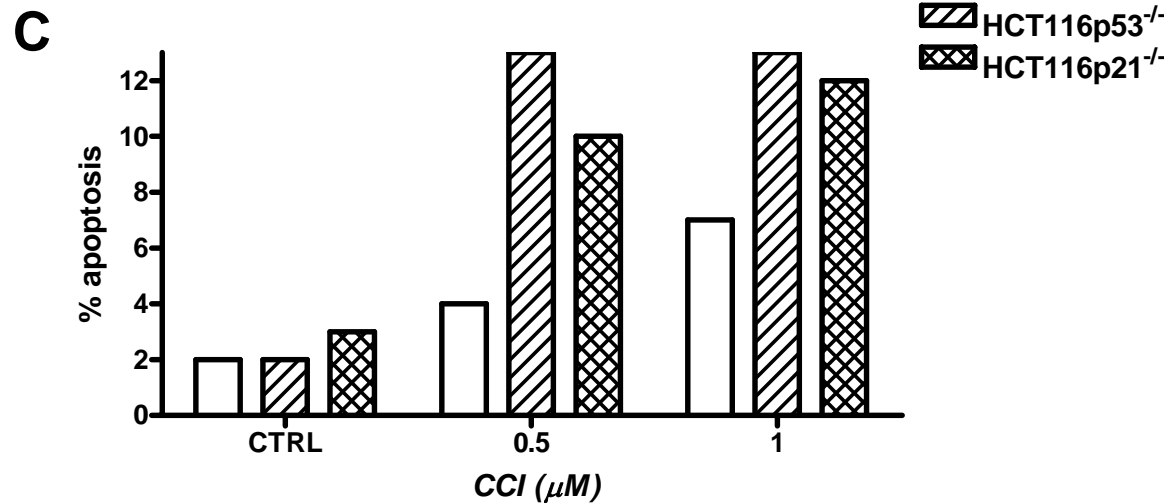

Supplement: NIHMS58451-supplement-05.pdf [file NIHMS58451-supplement-05.pdf]
